# Supplementary material
Source: PubMed Central journal article supplement (PMC1489133)
Supplement: molcellb_26_12_4387__1.pdf [file molcellb_26_12_4387__1.pdf]

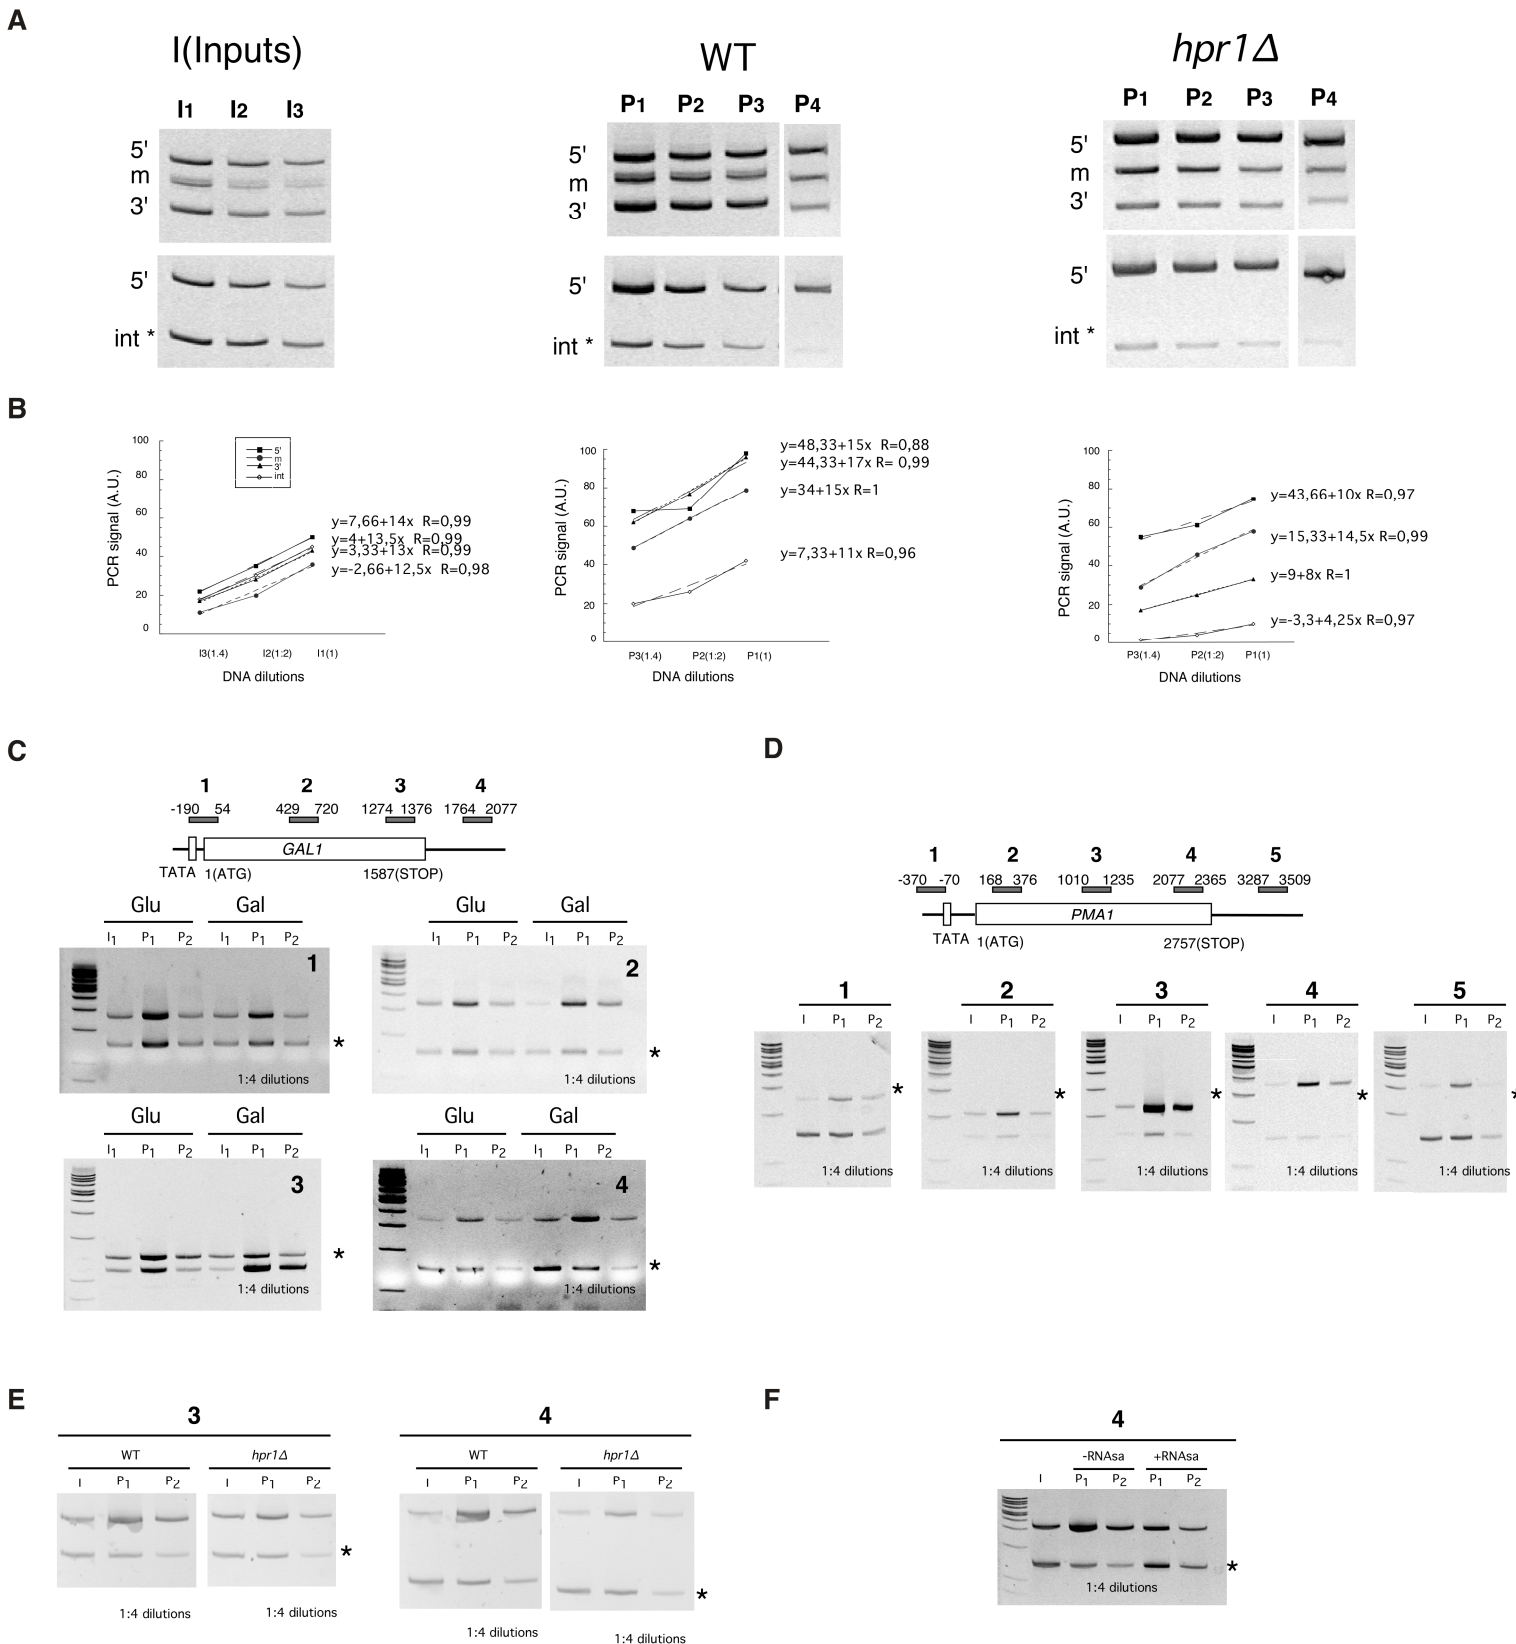

**Figure S1.** Titration of different DNA amounts in order to work within linear range in the PCRs corresponding to ChIP experiments involving the YLR454 coding region (A, B) and the *GAL1* and *PMA1* genes (C, D, E, F). **A)** Amplification were performed with serial dilutions of the total (input) (I) and immunoprecipitated (P) DNA. One representative acrylamide electrophoresis for each PCR reaction is shown (int\*= intergenic fragment used as control). **B)** Regression analysis of quantified PCR signals (R=regression coefficient). **C, D, E, F)** Example of different DNA dilutions used in the PCRs corresponding to ChIP experiments shown in Figure 4 (A, B, C and D respectively). (\*) Intergenic region of chromosome V (9716-9863) used as control.
