# Supplementary material
Source: PubMed Central journal article supplement (PMC1489133)
Supplement: molcellb_26_12_4387__3.pdf [file molcellb_26_12_4387__3.pdf]

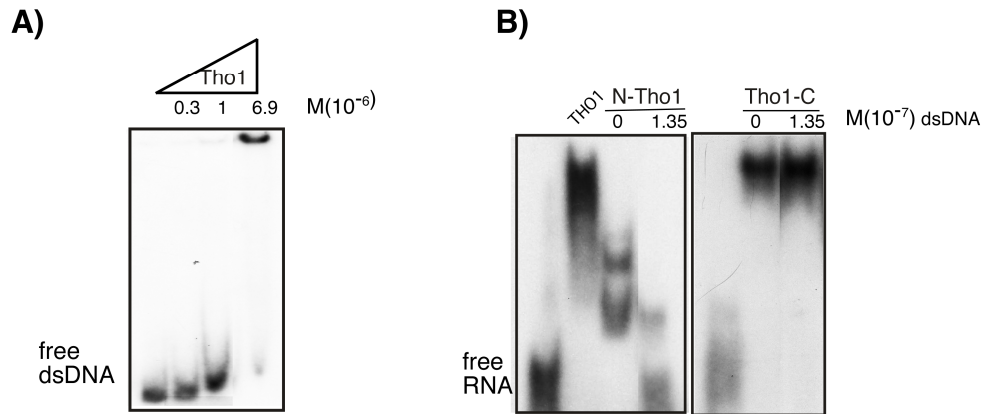

**Figure S3** Binding of Tho1 protein to dsDNA. **A)** DNA band shifting assay of Tho1, using as probe the PCR  $^{32}\text{P}$ -labeled 200-bp dsDNA (5ng) and increasing amounts of purified Tho1 as indicated. **B)** Competition assays of the RNA binding activity of the N-Tho1 ( $2.8 \text{ M } (10^{-6})$ ) and the Tho1C ( $2.8 \text{ M } (10^{-6})$ ) truncated forms of Tho1 using as cold competitor  $1.35 \text{ M } (10^{-7})$  of a 200-bp dsDNA fragment. Other details as in Figure 5 .
